# Supplementary material
Source: PubMed Central journal article supplement (PMC321745)
Supplement: pnas_0304849101_5.pdf [file pnas_0304849101_5.pdf]

**Table 2. C–N distances in TTR(105–115) fibrils**

| Atoms                |        | Measured NMR distance used in structure calculation, Å | Range of distances in ensemble of NMR structures, Å* |
|----------------------|--------|--------------------------------------------------------|------------------------------------------------------|
| Y105 C <sup>β</sup>  | T106 N | 3.3 ± 0.33                                             | 3.06–3.13                                            |
| Y105 C <sup>γ</sup>  | Y105 N | 3.18 ± 0.20 <sup>†</sup>                               | 3.01–3.33                                            |
|                      | T106 N | >3.5 <sup>†</sup>                                      | 4.12–4.44                                            |
| T106 C <sup>β</sup>  | I107 N | 3.5 ± 0.35                                             | 3.29–3.45                                            |
| T106 C <sup>γ</sup>  | T106 N | 3.6 ± 0.36                                             | 3.77–3.82                                            |
|                      | I107 N | 3.2 ± 0.32                                             | 3.31–3.52                                            |
| I107 C <sup>β</sup>  | A108 N | 3.4 ± 0.34                                             | 3.27–3.30                                            |
| I107 C <sup>γ1</sup> | I107 N | 3.1 ± 0.31                                             | 3.06–3.13                                            |
|                      | A108 N | 4.0 ± 0.40                                             | 4.43–4.45                                            |
| I107 C <sup>γ2</sup> | I107 N | 3.8 ± 0.38                                             | 3.80–3.82                                            |
|                      | A108 N | 3.1 ± 0.31                                             | 3.06–3.13                                            |
| I107 C <sup>δ</sup>  | I107 N | 4.6 ± 0.46                                             | 4.17–4.42                                            |
|                      | A108 N | 5.7 ± 0.57                                             | 5.65–5.75                                            |
| A108 C'              | L110N  | 4.25 <sup>+0.45</sup> <sub>-0.15</sub> ‡               | 4.16–4.46                                            |
| A108 C <sup>β</sup>  | A109 N | 3.5 ± 0.35                                             | 3.29–3.45                                            |
| A109 C <sup>β</sup>  | L110 N | 3.3 ± 0.33                                             | 3.31–3.53                                            |
| L110 C <sup>β</sup>  | L111 N | 3.6 ± 0.36                                             | 3.33–3.58                                            |
| L110 C <sup>δ1</sup> | L110 N | 4.2 ± 0.42                                             | 4.30–4.45                                            |
|                      | L111 N | 3.4 ± 0.34                                             | 3.50–3.72                                            |
| L111 C <sup>α</sup>  | L110N  | 4.56 <sup>+0.62</sup> <sub>-0.12</sub> ‡               | 4.60–4.79                                            |
| L111 C <sup>β</sup>  | S112 N | 3.8 ± 0.20 <sup>†</sup>                                | 3.53–3.54                                            |
| L111 C <sup>γ</sup>  | L111 N | 3.0 ± 0.30                                             | 2.95–3.02                                            |
|                      | S112 N | 4.6 ± 0.46                                             | 4.83–4.85                                            |
| L111 C <sup>δ1</sup> | L111 N | > 3.5                                                  | 4.33–4.44                                            |
|                      | S112 N | > 3.5                                                  | 5.93–6.00                                            |
| L111 C <sup>δ2</sup> | L111 N | 3.2 ± 0.32                                             | 3.45–3.54                                            |
|                      | S112 N | 5.5 ± 0.55                                             | 4.95–5.02                                            |
| S112 C'              | Y114N  | 4.06 <sup>+0.36</sup> <sub>-0.06</sub> ‡               | 4.00–4.17                                            |
| P113 C <sup>β</sup>  | P113 N | 2.4 ± 0.24                                             | —                                                    |

| Atoms               |        | Measured NMR distance used in structure calculation, Å | Range of distances in ensemble of NMR structures, Å* |
|---------------------|--------|--------------------------------------------------------|------------------------------------------------------|
|                     | Y114 N | $3.7 \pm 0.37$                                         | 3.33–3.46                                            |
| P113 C <sup>γ</sup> | P113 N | $2.3 \pm 0.23$                                         | —                                                    |
|                     | Y114 N | > 3.5                                                  | 4.31–4.66                                            |
| P113 C <sup>δ</sup> | S112 N | $3.2 \pm 0.32$                                         | 3.61–3.62                                            |
| Y114 C <sup>γ</sup> | Y114 N | > 2.8 <sup>†</sup>                                     | 3.13–3.80                                            |
| S115 C <sup>α</sup> | Y114N  | $5.0^{+1.8}_{-0.5}$ <sup>‡</sup>                       | 4.73–4.85                                            |

Experimental NMR distances are compared with corresponding distances in the ensemble of 20 low-energy structures calculated using simulated annealing molecular dynamics in CNS (1). A total of 35 distances used in the structure calculation are in the 3–6 Å regime and depend on at least one dihedral angle. Unless otherwise indicated distances were determined using the 3D *z*-filtered transferred-echo double-resonance technique (2) in uniformly <sup>13</sup>C, <sup>15</sup>N-labeled fibrils.

\*As evaluated by MOLMOL (3).

<sup>†</sup>Distance determined by using frequency selective REDOR (4) in uniformly <sup>13</sup>C, <sup>15</sup>N-labeled fibrils.

<sup>‡</sup>Distance determined by using REDOR (5) in selectively <sup>13</sup>C, <sup>15</sup>N-labeled fibrils (6).

Uncertainties include the potential contribution from intermolecular dipolar couplings as discussed in ref. 6.

1. Brunger, A. T., Adams, P. D., Clore, G. M., DeLano, W. L., Gros, P., Grosse-Kunstleve, R. W., Jiang, J. S., Kuszewski, J., Nilges, M., Pannu, N. S., *et al.* (1998) *Acta Crystallogr. D* **54**, 905–921.
2. Jaroniec, C. P., Filip, C. & Griffin, R. G. (2002) *J. Am. Chem. Soc.* **124**, 10728–10742.
3. Koradi, R., Billeter, M. & Wuthrich, K. (1996) *J. Mol. Graphics* **14**, 51–55.
4. Jaroniec, C. P., Tounge, B. A., Herzfeld, J. & Griffin, R. G. (2001) *J. Am. Chem. Soc.* **123**, 3507–3519.
5. Gullion, T. & Schaefer, J. (1989) *J. Magn. Reson.* **81**, 196–200.
6. Jaroniec, C. P., MacPhee, C. E., Astrof, N. S., Dobson, C. M. & Griffin, R. G. (2002) *Proc. Natl. Acad. Sci. USA* **99**, 16748–16753.
