# Supplementary material
Source: PubMed Central journal article supplement (PMC321745)
Supplement: pnas_0304849101_6.pdf [file pnas_0304849101_6.pdf]

**Table 3. Backbone torsion angles  $\phi$  and  $\psi$  in TTR(105–115) fibrils**

| Residue | $\phi$ Measurement, ° |                                                      | $\psi$ Measurement, ° |                                                        |                                     | $\phi$ , °* | $\psi$ , °*          |
|---------|-----------------------|------------------------------------------------------|-----------------------|--------------------------------------------------------|-------------------------------------|-------------|----------------------|
|         | TALOS                 | H–N <sub>i</sub> –<br>C <sup>α</sup> <sub>i</sub> –H | TALOS                 | H–N <sub>i+1</sub> –C <sup>α</sup> <sub>i</sub> –<br>H | N–C <sup>α</sup> –C <sup>β</sup> –N |             |                      |
| Y105    | —                     | —                                                    | —                     | –180–90<br>150–180                                     | –168––160<br>160–168                | —           | 164 ± 4 <sup>†</sup> |
| T106    | —                     | –139–<br>–101                                        | —                     | 90–150                                                 | –140–140                            | –120 ± 19   | 115 ± 25             |
| I107    | –145–<br>–105         | –143––97                                             | 131–155               | 90–150                                                 | –137–137                            | –124 ± 19   | 134 ± 3              |
| A108    | –139––95              | –142– –98                                            | 120–146               | 92–148                                                 | –140–140                            | –119 ± 21   | 130 ± 10             |
| A109    | –145–<br>–117         | –141––99                                             | 111–147               | 90–150                                                 | –139–139                            | –129 ± 12   | 125 ± 14             |
| L110    | –130––94              | –139–<br>–101                                        | 104–136               | 90–150                                                 | –144–144                            | –116 ± 15   | 120 ± 16             |
| L111    | –140––96              | –140–<br>–100                                        | 122–152               | 90–150                                                 | –153–153                            | –120 ± 20   | 136 ± 14             |
| S112    | –131––87              | –139–<br>–101                                        | 109–163               | —                                                      | –146–146                            | –116 ± 15   | 128 ± 19             |
| P113    | –112––50              | —                                                    | 107–145               | 90–150                                                 | –157–157                            | –81 ± 31    | 126 ± 19             |
| Y114    | –139––85              | –139–<br>–101                                        | 123–153               | —                                                      | —                                   | –120 ± 19   | 138 ± 15             |
| S115    | —                     | —                                                    | —                     | —                                                      | —                                   | —           | —                    |

Backbone torsion angles were predicted based on NMR chemical shifts by using the program TALOS (1) and were measured directly by using 3D dipolar-chemical shift correlation experiments,  $^1\text{H}^{\text{N}}_i$ – $^{15}\text{N}_i$ – $^{13}\text{C}^{\alpha}_i$ – $^1\text{H}^{\alpha}_i$  (2, 3),  $^1\text{H}^{\text{N}}_{i+1}$ – $^{15}\text{N}_{i+1}$ – $^{13}\text{C}^{\alpha}_i$ – $^1\text{H}^{\alpha}_i$  (3), and  $^{15}\text{N}_i$ – $^{13}\text{C}^{\alpha}_i$ – $^{13}\text{C}^{\beta}_i$ – $^{15}\text{N}_{i+1}$  (4, 5). Uncertainties for  $^1\text{H}^{\text{N}}_i$ – $^{15}\text{N}_i$ – $^{13}\text{C}^{\alpha}_i$ – $^1\text{H}^{\alpha}_i$ ,  $^1\text{H}^{\text{N}}_{i+1}$ – $^{15}\text{N}_{i+1}$ – $^{13}\text{C}^{\alpha}_i$ – $^1\text{H}^{\alpha}_i$ , and  $^{15}\text{N}_i$ – $^{13}\text{C}^{\alpha}_i$ – $^{13}\text{C}^{\beta}_i$ – $^{15}\text{N}_{i+1}$  experiments contain systematic contributions from the potential 2–3° variations in three-atom bond angles (6) and contributions due to random

noise (obtained using an F-test approach with a 90% confidence limit). For the  $^1\text{H}^{\text{N}}_{i-}$ - $^{15}\text{N}^{\text{N}}_{i-}$ - $^{13}\text{C}^{\alpha}_{i-}$ - $^1\text{H}^{\alpha}_{i-}$  and  $^1\text{H}^{\text{N}}_{i+1-}$ - $^{15}\text{N}^{\text{N}}_{i+1-}$ - $^{13}\text{C}^{\alpha}_{i-}$ - $^1\text{H}^{\alpha}_{i-}$  experiments the combination of systematic and random uncertainties leads to the coalescence of characteristic pairs of degenerate solutions (about  $\phi = -120^\circ$  for  $^1\text{H}^{\text{N}}_{i-}$ - $^{15}\text{N}^{\text{N}}_{i-}$ - $^{13}\text{C}^{\alpha}_{i-}$ - $^1\text{H}^{\alpha}_{i-}$  and  $\psi = 120^\circ$  for  $^1\text{H}^{\text{N}}_{i+1-}$ - $^{15}\text{N}^{\text{N}}_{i+1-}$ - $^{13}\text{C}^{\alpha}_{i-}$ - $^1\text{H}^{\alpha}_{i-}$ ) into single minima.

\* $\phi$  and  $\psi$  values used in the calculation of the ensemble of low-energy peptide structures were obtained by combining the results of the TALOS and dipolar tensor correlation experiments to obtain a single self-consistent solution.

†For Y105 the only solution consistent with the Y105  $^{13}\text{C}^{\beta}$ -T106  $^{15}\text{N}$  distance of  $3.3 \pm 0.33 \text{ \AA}$  (Table 2) is  $\psi = 164 \pm 4^\circ$ . The  $\psi = -164 \pm 4^\circ$  solution corresponds to a distance of  $\approx 2.8 \text{ \AA}$  and was therefore neglected.

1. Cornilescu, G., Delaglio, F. & Bax, A. (1999) *J. Biomol. NMR* **13**, 289–302.
2. Hong, M., Gross, J. D., Hu, W. & Griffin, R. G. (1998) *J. Magn. Reson.* **135**, 169–177.
3. Rienstra, C. M., Hohwy, M., Mueller, L. J., Jaroniec, C. P., Reif, B. & Griffin, R. G. (2002) *J. Am. Chem. Soc.* **124**, 11908–11922.
4. Costa, P. R., Gross, J. D., Hong, M. & Griffin, R. G. (1997) *Chem. Phys. Lett.* **280**, 95–103.
5. Feng, X., Eden, M., Brinkmann, A., Luthman, H., Eriksson, L., Gräslund, A., Antzutkin, O. N. & Levitt, M. H. (1997) *J. Am. Chem. Soc.* **119**, 12006–12007.
6. Engh, R. A. & Huber, R. (1991) *Acta Crystallogr. A* **47**, 392–400.
