# Supplementary material
Source: PubMed Central journal article supplement (PMC321745)
Supplement: pnas_0304849101_7.pdf [file pnas_0304849101_7.pdf]

**Table 4. Average torsion angles in the NMR structure of TTR(105–115) in the fibrillar state**

| Residue | Angle    | Angle, °*     |
|---------|----------|---------------|
| Y105    | $\psi$   | $163 \pm 3$   |
|         | $\chi^1$ | $-80 \pm 10$  |
|         | $\chi^2$ | $94 \pm 16$   |
| T106    | $\phi$   | $-115 \pm 10$ |
|         | $\psi$   | $133 \pm 5$   |
|         | $\chi^1$ | $-49 \pm 6$   |
| I107    | $\phi$   | $-128 \pm 12$ |
|         | $\psi$   | $138 \pm 1$   |
|         | $\chi^1$ | $-75 \pm 2$   |
| A108    | $\chi^2$ | $163 \pm 7$   |
|         | $\phi$   | $-123 \pm 11$ |
|         | $\psi$   | $130 \pm 6$   |
| A109    | $\phi$   | $-131 \pm 8$  |
|         | $\psi$   | $126 \pm 9$   |
| L110    | $\phi$   | $-119 \pm 9$  |
|         | $\psi$   | $124 \pm 9$   |
|         | $\chi^1$ | $179 \pm 4$   |
| L111    | $\chi^2$ | $59 \pm 5$    |
|         | $\phi$   | $-120 \pm 11$ |
|         | $\psi$   | $120 \pm 1$   |
| S112    | $\chi^1$ | $-60 \pm 1$   |
|         | $\chi^2$ | $-177 \pm 2$  |
|         | $\phi$   | $-115 \pm 9$  |
| P113    | $\psi$   | $106 \pm 1$   |
|         | $\psi$   | $140 \pm 4$   |

| Residue | Angle    | Angle, °*     |
|---------|----------|---------------|
| Y114    | $\phi$   | $-124 \pm 12$ |
|         | $\psi$   | $138 \pm 10$  |
|         | $\chi^1$ | $-112 \pm 28$ |
|         | $\chi^2$ | $96 \pm 18$   |
| S115    | $\phi$   | $-116 \pm 76$ |

All peptide bond torsion angles,  $\omega$ , were within  $2^\circ$  of  $\omega = 180^\circ$  and are not listed. Torsion angles were evaluated by using MOLMOL (1).

1. Koradi, R., Billeter, M. & Wuthrich, K. (1996) *J. Mol. Graphics* **14**, 51–55.
