# Supplementary material
Source: PubMed Central journal article supplement (PMC321745)

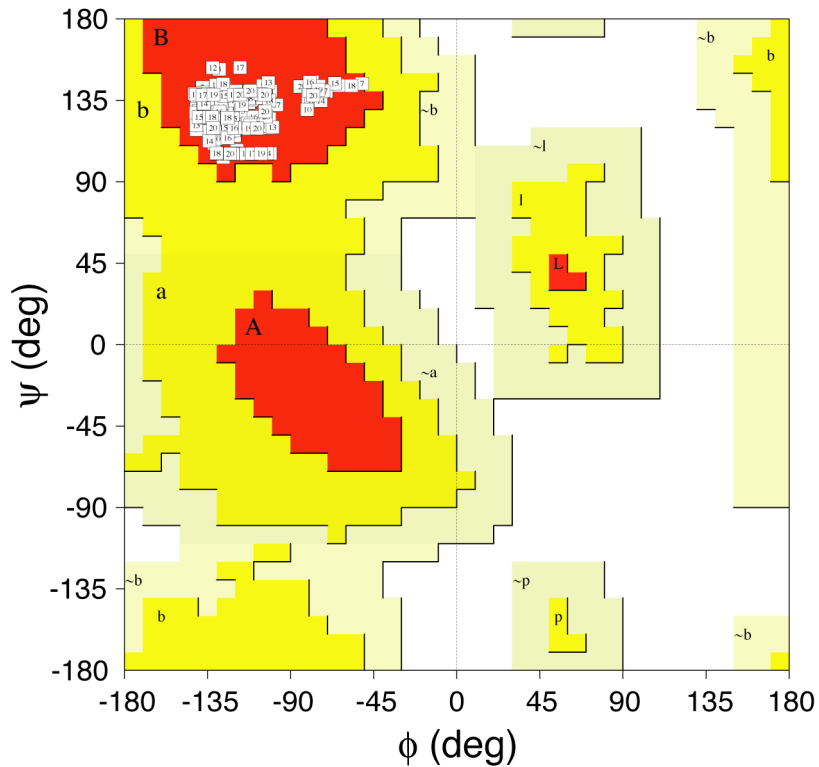

Supplement: pnas_0304849101_2.pdf [file pnas_0304849101_2.pdf]

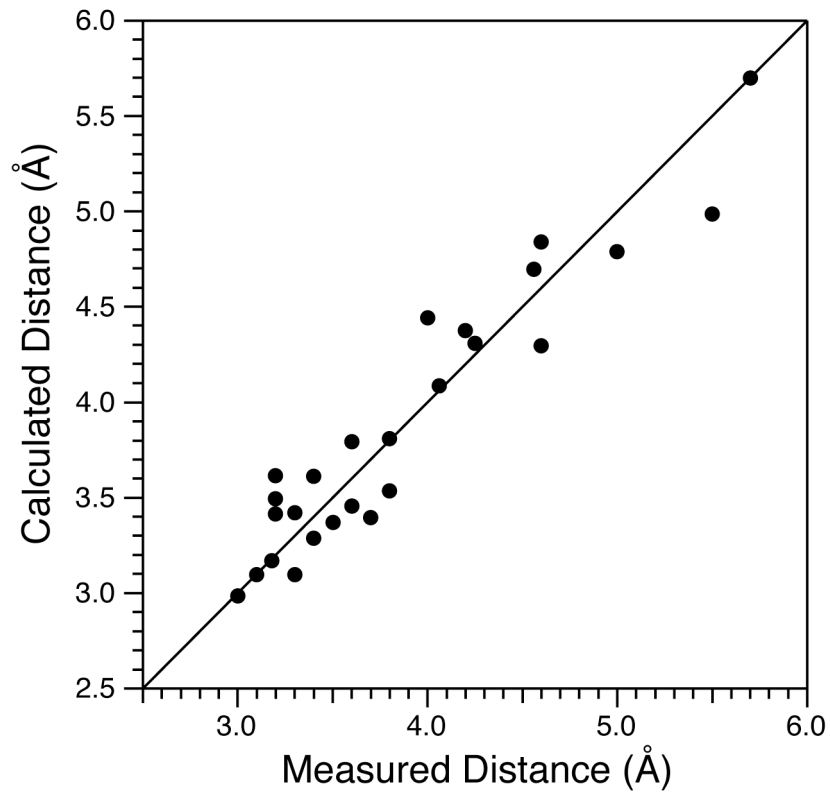

Supplement: pnas_0304849101_4.pdf [file pnas_0304849101_4.pdf]
